# Supplementary material for: Adsorbed O promotes alternative, nonselective oxametallacycle reaction pathways in Ag-catalyzed epoxidation
Source: Royal Society of Chemistry journal article supplement (doi:10.1039/d4cy01486c), 2025-01-01
Supplement: d4cy01486c1.pdf [file d4cy01486c1.pdf]

# Supplementary Information for Adsorbed O Promotes Alternative, Nonselective Oxametallacycle Reaction Pathways in Ag-Catalyzed Epoxidation

Shengjie Zhang<sup>†</sup>, Sarah M. Stratton<sup>†</sup>, Matthew M. Montemore<sup>\*</sup>

Department of Chemical and Biomolecular Engineering, Tulane University, New Orleans,  
Louisiana 70118, USA

\*mmontemore@tulane.edu

<sup>†</sup>These two authors contributed equally to this work

## 1 Adsorbate configurations

The bond angles and adsorption sites for Figure 1 are shown in Table S1.

**Table S1:** The adsorbates used in Figure 1. OMC and EO with surface O present are shown, as they have the same angle and site of the same case without surface O.

| Adsorbate (from OMC) | Side view | Top view |
|----------------------|-----------|----------|
| OMC                  |           |          |
| OMC with surface O   |           |          |

|                   |                                                                                     |                                                                                       |
|-------------------|-------------------------------------------------------------------------------------|---------------------------------------------------------------------------------------|
| EO with surface O | 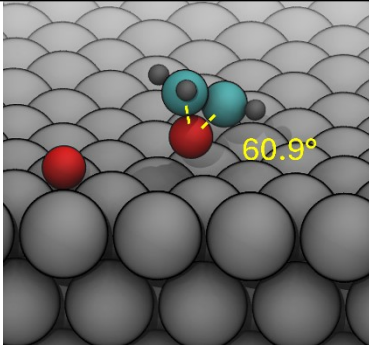   |    |
| $H_{\text{surf}}$ |    |    |
| AA                |   |   |
| VA                |  |  |

|                           |                                                                                   |                                                                                     |
|---------------------------|-----------------------------------------------------------------------------------|-------------------------------------------------------------------------------------|
| $\text{OH}_{\text{surf}}$ | 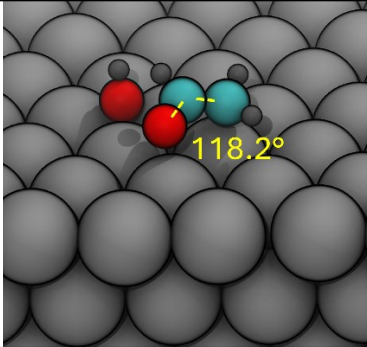 |  |
| EDO                       |  |  |

The bond angles and adsorption sites for Figure 4 are shown in Table S2.

**Table S2:** Additional structures relevant to Figure 4. EO and AA were shown in Table S1.

| Adsorbate (from EDO)      | Side view                                                                           | Top view                                                                              |
|---------------------------|-------------------------------------------------------------------------------------|---------------------------------------------------------------------------------------|
| $\text{H}_{\text{surf}}$  | 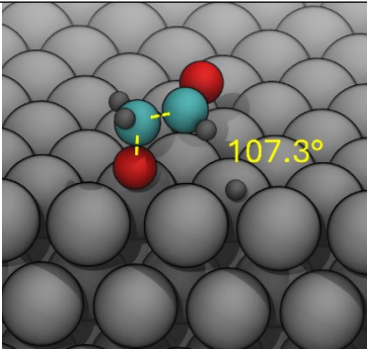 |  |
| $\text{OH}_{\text{surf}}$ |  |  |

The bond angles and adsorption sites for Figure 5 are shown in Table S3.

**Table S3:** The adsorbates from Figure 5 showing the PO pathway.

| Adsorbate (OMC)    | Side view                                                                           | Top view                                                                              |
|--------------------|-------------------------------------------------------------------------------------|---------------------------------------------------------------------------------------|
| PO                 | 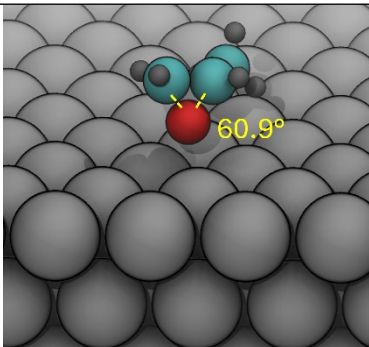   |    |
| PA                 |   |   |
| OH <sub>surf</sub> |  |  |
| PDO                |  |  |
